# Supplementary material
Source: PubMed Central journal article supplement (PMC4822464)
Supplement: rspb20160047supp1.pdf [file rspb20160047supp1.pdf]

1 **Supplementary materials**

2

3 **Supplementary methods**

4 **(a) Phylogenetic tree construction**

5         We constructed a phylogenetic tree for the 30 species in our experiment using Bayesian  
6 methods on ITS1/5.8S/ITS2 and rbcL nucleotide sequence regions. These regions were chosen  
7 because they are relatively fast and slow evolving, respectively, and are thus good complements  
8 for estimating divergence times at different depths in the phylogenetic tree. Separately for each  
9 region, sequences were retrieved from GenBank, aligned using the MUSCLE algorithm in  
10 MEGA (version 4.0), and combined into a single sequence matrix for analysis. We then loaded  
11 the aligned sequence data from both sequence regions into BEAST (version 2.3.1) and generated  
12 a Bayesian tree using a GTR substitution model selected by ModelTest (version 3.7) and an  
13 uncorrelated lognormal relaxed molecular clock for branch length estimation; the site and clock  
14 models of the two sequence regions were unlinked. We set lognormal priors on four internal  
15 nodes (Poales = 1.8 [mean], 0.5 [standard deviation], 68.1 [minimum age in millions of years];  
16 Fabales = 1.5, 0.5, 59.9; Caryophyllales = 1.5, 0.5, 83.5; Lamiales = 1.5, 0.5, 44.3) based on  
17 published node calibrations for these groups, to calibrate the tree to real-time (in millions of  
18 years) with the minimum age constraints based on the fossil record [47]. We constrained the tree  
19 topology at nodes above the family-level based on well-resolved relationships in the angiosperms  
20 [48,49], and thus did not require an outgroup to root the tree because BEAST automatically  
21 performs molecular clock rooting above the constrained nodes. We ran the MCMC chain for  
22 100,000,000 generations, with a 10,000,000 burn-in and data logging every 9,000 generations.  
23 This analysis generated 10,000 posterior trees, which were summarized into a single ultrametric

24 maximum clade credibility tree with median node heights. The resulting tree (figure S1) is fully  
25 resolved and consistent with Angiosperm Phylogeny Group III classifications and estimated  
26 divergence times of major groups [49]. We used the ‘cophenetic.phylo’ function in the R  
27 package ‘ape’ to calculate all pairwise phylogenetic distances based on the branch length  
28 information of the 30 study species.

### 29 **(b) Details of lambda estimation**

30 As described in the *Materials and methods*, we grew plants at low densities with seven  
31 replicate pots per species  $\times$  soil moisture environment. These replicates were used to calculate  
32 the distribution of log-transformed finite rates of increase ( $\lambda$ ) for each combination of species  $\times$   
33 soil moisture environment by fitting separate linear models. The linear models tested the effects  
34 of the number of individuals in each low density pot on finite rate of increase, to identify species  
35 for which competition might affect our estimates of  $\lambda$ . These linear models were possible  
36 because, although we thinned pots to eight individuals, low germination rates or post-thinning  
37 germination/mortality caused some variation among pots in the numbers of individuals that were  
38 present (mean = 6.3, sd = 2.2 individuals). For species with a significant to marginally-  
39 significant slope ( $P < 0.1$ ), we confirmed that significance was not driven by outlying  
40 observations, and then used the intercept ( $\pm$  standard deviation [sd]) of the population growth  
41 rate as  $\lambda$ . For species with a non-significant slope, we used the mean ( $\pm$  sd) population growth  
42 rate across all replicates as  $\lambda$ . In both cases, these estimates were used as informative priors in the  
43 Bayesian analysis described in the *Materials and methods*. For those species that have been  
44 studied elsewhere, our estimated  $\lambda$  values were, on average, within one standard deviation (mean  
45 = 0.56 standard deviations,  $n = 3$ ) of existing estimates in the literature [28].

46

47 **Supplementary equations**

48 Equations for stabilizing differences (Eq. **S1**) and fitness differences (Eq. **S2, S3**) as described in

49 *Materials and methods*:

50 
$$1 - \rho = 1 - \sqrt{\frac{\alpha_{ij}}{\alpha_{jj}} \cdot \frac{\alpha_{ji}}{\alpha_{ii}}} \quad (\text{S1})$$

51

52 
$$\kappa_j / \kappa_i = \frac{\lambda_j - 1}{\lambda_i - 1} \cdot \sqrt{\frac{\alpha_{ij}}{\alpha_{jj}} \cdot \frac{\alpha_{ii}}{\alpha_{ji}}} \quad (\text{S2})$$

53

54 
$$K = \max(\kappa_j / \kappa_i, \kappa_i / \kappa_j) \quad (\text{S3})$$

55

56

57

58

59

60

61

62

63

64

65

66 **Table S1**

67 **Taxonomic and sequence accession (ITS1/5.8S/ITS2 and rbcL regions) information for the 30 study species, organized to show**  
 68 **each focal species and its sympatric and allopatric competitor**

| <b>Species names</b>                     | <b>Order</b>   | <b>Family</b>   | <b>Origin</b> | <b>ITS1/5.8S/ITS2</b> | <b>rbcL</b> |
|------------------------------------------|----------------|-----------------|---------------|-----------------------|-------------|
| <i>Lasthenia glabrata</i>                | Asterales      | Asteraceae      | California    | AF391593.1            | AIW51855.1* |
| <i>Lasthenia californica</i>             | Asterales      | Asteraceae      | California    | AF467195.1            | NA          |
| <i>Centaurea melitensis</i> <sup>1</sup> | Asterales      | Asteraceae      | Spain         | HQ540425.1            | EU384954.1  |
| <i>Uropappus lindleyi</i>                | Asterales      | Asteraceae      | California    | AF386495.1            | NA          |
| <i>Madia elegans</i>                     | Asterales      | Asteraceae      | California    | AF413612.1            | AY215141.1* |
| <i>Crepis capillaris</i> <sup>1</sup>    | Asterales      | Asteraceae      | Spain         | AJ633353              | KM360738.1  |
| <i>Phacelia campanularia</i>             | Boraginales    | Boraginaceae    | California    | AF091188.1            | KF158107.1  |
| <i>Nemophila menziesii</i>               | Boraginales    | Boraginaceae    | California    | AF091183.1            | KF158108.1  |
| <i>Myosotis arvensis</i>                 | Boraginales    | Boraginaceae    | Spain         | AY092908.1            | HM850186.1  |
| <i>Chenopodium berlandieri</i>           | Caryophyllales | Amaranthaceae   | California    | HE577429.1            | JF941268.1* |
| <i>Claytonia perfoliata</i> <sup>2</sup> | Caryophyllales | Montiaceae      | California    | AY764040.1            | AF132093.1  |
| <i>Portulaca oleracea</i>                | Caryophyllales | Portulacaceae   | Spain         | JF508578.1            | HQ621340.1  |
| <i>Monolepis nuttalliana</i>             | Caryophyllales | Amaranthaceae   | California    | HE577375.1            | AY270108.1  |
| <i>Atriplex patula</i> <sup>2</sup>      | Caryophyllales | Amaranthaceae   | California    | DQ499332.1            | HM849801.1  |
| <i>Silene gallica</i>                    | Caryophyllales | Caryophyllaceae | Spain         | U30959/U30985         | HM850354.1  |
| <i>Lupinus bicolor</i>                   | Fabales        | Fabaceae        | California    | DQ524209.1            | Z70056.1*   |
| <i>Lotus purshianus</i>                  | Fabales        | Fabaceae        | California    | AF467067.1            | HM850139.1* |
| <i>Trifolium incarnatum</i>              | Fabales        | Fabaceae        | Spain         | AF053160.1            | HM850415.1  |
| <i>Salvia columbariae</i>                | Lamiales       | Lamiaceae       | California    | DQ667219.1*           | AY570408.1  |
| <i>Collinsia heterophylla</i>            | Lamiales       | Lamiaceae       | California    | AF385337.1            | AF026825.1* |

|                                       |              |              |            |             |            |
|---------------------------------------|--------------|--------------|------------|-------------|------------|
| <i>Salvia viridis</i>                 | Lamiales     | Lamiaceae    | Spain      | DQ667222.1* | AY570450.1 |
| <b><i>Bromus carinatus</i></b>        | Poales       | Poaceae      | California | AY367948.1  | KM360707.1 |
| <i>Hordeum depressum</i>              | Poales       | Poaceae      | California | AJ607894.1  | NA         |
| <i>Hordeum vulgare</i>                | Poales       | Poaceae      | Spain      | FJ593180.1  | AY137456.1 |
| <b><i>Vulpia microstachys</i></b>     | Poales       | Poaceae      | California | EF584981.1  | NA         |
| <i>Vulpia octoflora</i>               | Poales       | Poaceae      | California | EF584982.1  | KJ773986   |
| <i>Vulpia myuros</i>                  | Poales       | Poaceae      | Spain      | AY118092.1  | KF713076.1 |
| <b><i>Eschscholzia caespitosa</i></b> | Ranunculales | Papaveraceae | California | JF892592.1  | NA         |
| <i>Eschscholzia californica</i>       | Ranunculales | Papaveraceae | California | DQ912884.1  | HM849984.1 |
| <i>Papaver dubium</i>                 | Ranunculales | Papaveraceae | Spain      | DQ250322.1  | HM850229.1 |

69 Notes: Species contrasts are delineated by row shading, with the focal species in bold type. Superscripts represent contrasts with  
70 partial branch length overlap, one of which (*M. nuttalliana*/*A. patula*<sup>2</sup>) was excluded from analysis because the latter species failed to  
71 flower. \*Sequences were unavailable, and were replaced with those of known sister species (*S. columbariae* = *S. clevelandii*, *S. viridis*  
72 = *S. sclarea* [46]) or congeners as appropriate. ‘NA’ means that sequences were unavailable for that specific region and species.

73 **Table S2**74 **Comparing fits of alternative annual plant models**

| Model                                                                                                   | AICc scores |
|---------------------------------------------------------------------------------------------------------|-------------|
| 1 $N_{i\ t+1} = N_{i\ t} \cdot \frac{\lambda_i}{1 + \alpha_{ii}N_{i\ t} + \alpha_{ij}N_{j\ t}}$         | <b>2236</b> |
| 2 $N_{i\ t+1} = N_{i\ t} \cdot \lambda_i e^{-\alpha_{ii}N_{i\ t} - \alpha_{ij}N_{j\ t}}$                | 2468        |
| 3 $N_{i\ t+1} = N_{i\ t} \cdot \frac{\lambda_i}{1 + N_{i\ t}^{\alpha_{ii}} + N_{j\ t}^{\alpha_{ij}}}$   | 2556        |
| 4 $N_{i\ t+1} = N_{i\ t} \cdot \frac{\lambda_i}{1 + (\alpha_{ii}N_{i\ t} + \alpha_{ij}N_{j\ t})^{b_i}}$ | 2625        |
| 5 $N_{i\ t+1} = N_{i\ t} \cdot \lambda_i e^{-\alpha_{ii}\ln(N_{i\ t+1}) - \alpha_{ij}\ln(N_{j\ t+1})}$  | 2748        |
| 6 $N_{i\ t+1} = N_{i\ t} \cdot \frac{\lambda_i}{(1 + \alpha_{ii}N_{i\ t} + \alpha_{ij}N_{j\ t})^{b_i}}$ | 2892        |

75 Notes: All models were simultaneously fit to each focal species  $i$  vs. sympatric species  $j$  and  
76 allopatric species  $k$ . The AICc scores were summed across each three-species contrast  $\times$  soil  
77 moisture environment for model comparison. The parameters are described in the *Materials and*  
78 *methods*, except for  $b_i$  which allows individuals to vary in competitive impacts as their density  
79 increases. Model formulations are taken from Levine and HilleRisLambers [28].

80 **Table S3**81 **Parameter estimates used to calculate stabilizing and fitness differences (Eqs. S1 and S2)**

| Species                       |                        |                      |          | Parameter estimates |             |             |               |               |               |               |               |               |               |
|-------------------------------|------------------------|----------------------|----------|---------------------|-------------|-------------|---------------|---------------|---------------|---------------|---------------|---------------|---------------|
| <i>i</i>                      | <i>j</i>               | <i>k</i>             | Soil env | $\lambda_i$         | $\lambda_j$ | $\lambda_k$ | $\alpha_{ii}$ | $\alpha_{jj}$ | $\alpha_{kk}$ | $\alpha_{ij}$ | $\alpha_{ji}$ | $\alpha_{ik}$ | $\alpha_{ki}$ |
| <b><i>B. carinatus</i></b>    | <i>H. depressum</i>    | <i>H. vulgare</i>    | wet      | 79.0                | 155.1       | 22.8        | 0.175         | 0.138         | 0.227         | 0.001         | 0.795         | 0.623         | 0.006         |
| <b><i>C. berlandieri</i></b>  | <i>C. perfoliata</i>   | <i>P. oleracea</i>   | wet      | 69.4                | 8.6         | 509.2       | 0.223         | 0.007         | 279.72        | <0.001        | 0.065         | <0.001        | 219.90        |
| <b><i>E. caespitosa</i></b>   | <i>E. californica</i>  | <i>P. dubium</i>     | wet      | 67.0                | 53.7        | 947.4       | 0.004         | 0.012         | 0.705         | 3.573         | 2.388         | 15.10         | 0.008         |
| <b><i>L. bicolor</i></b>      | <i>L. purshianus</i>   | <i>T. incarnatum</i> | wet      | 4.3                 | 58.4        | 1136.3      | 0.563         | 12.01         | 20.18         | 0.796         | 0.096         | 7.845         | 0.945         |
| <b><i>L. glabrata</i></b>     | <i>L. californica</i>  | <i>C. melitensis</i> | wet      | 389.8               | 839.0       | 1.8         | 0.054         | 0.098         | 0.180         | 0.003         | 0.219         | 0.001         | 0.728         |
| <b><i>M. nuttalliana</i></b>  | <i>A. patula</i>       | <i>S. gallica</i>    | wet      | 587.5               | 0.1         | 989.4       | 0.263         | 0.001         | 0.119         | 0.003         | <0.001        | 8.227         | <0.001        |
| <b><i>P. campanularia</i></b> | <i>N. menziesii</i>    | <i>M. arvensis</i>   | wet      | 63.6                | 9.6         | 352.4       | 0.142         | 0.140         | 0.107         | 0.006         | 0.004         | 0.004         | <0.001        |
| <b><i>S. columbariae</i></b>  | <i>C. heterophylla</i> | <i>S. viridis</i>    | wet      | 318.9               | 727.9       | 75.6        | 0.231         | 2.358         | 0.126         | 0.403         | 0.001         | 0.128         | 0.070         |
| <b><i>U. lindleyi</i></b>     | <i>M. elegans</i>      | <i>C. capillaris</i> | wet      | 35.9                | 75.5        | 323.6       | 0.384         | 1.271         | 1.342         | 0.069         | 0.001         | 0.003         | 0.002         |
| <b><i>V. microstachys</i></b> | <i>V. octoflora</i>    | <i>V. myuros</i>     | wet      | 235.8               | 923.8       | 314.8       | 0.099         | 0.456         | 0.200         | 0.083         | 0.302         | 0.227         | 0.002         |
| <b><i>B. carinatus</i></b>    | <i>H. depressum</i>    | <i>H. vulgare</i>    | dry      | 563.3               | 138.0       | 15.7        | 2.176         | 0.036         | 0.266         | 0.001         | 1.291         | 2.85          | 0.005         |
| <b><i>C. berlandieri</i></b>  | <i>C. perfoliata</i>   | <i>P. oleracea</i>   | dry      | 44.1                | 14.5        | 331.1       | 0.267         | 0.022         | 0.017         | 0.001         | 0.072         | 0.001         | 221.85        |
| <b><i>E. caespitosa</i></b>   | <i>E. californica</i>  | <i>P. dubium</i>     | dry      | 100.9               | 52.2        | 617.4       | 0.010         | 3.091         | 0.829         | 9.309         | 0.002         | 56.02         | 0.004         |
| <b><i>L. bicolor</i></b>      | <i>L. purshianus</i>   | <i>T. incarnatum</i> | dry      | 7.1                 | 13.1        | 392.8       | 3.983         | 3.551         | 13.42         | 2.158         | 0.003         | 8.221         | 0.009         |
| <b><i>L. glabrata</i></b>     | <i>L. californica</i>  | <i>C. melitensis</i> | dry      | 468.7               | 666.3       | 1.6         | 0.157         | 0.214         | 0.438         | 0.042         | 0.105         | 0.066         | 0.689         |
| <b><i>M. nuttalliana</i></b>  | <i>A. patula</i>       | <i>S. gallica</i>    | dry      | 1148.4              | 0.1         | 923.8       | 0.045         | 0.001         | 0.153         | 0.611         | <0.001        | 8.303         | <0.001        |
| <b><i>P. campanularia</i></b> | <i>N. menziesii</i>    | <i>M. arvensis</i>   | dry      | 103.9               | 3.8         | 303.2       | 0.361         | 0.009         | 0.136         | 0.006         | 0.026         | 0.002         | <0.001        |
| <b><i>S. columbariae</i></b>  | <i>C. heterophylla</i> | <i>S. viridis</i>    | dry      | 305.3               | 124.3       | 69.8        | 0.130         | 0.518         | 0.177         | 0.847         | <0.001        | 0.444         | 0.038         |
| <b><i>U. lindleyi</i></b>     | <i>M. elegans</i>      | <i>C. capillaris</i> | dry      | 38.3                | 120.3       | 166.9       | 0.505         | 3.608         | 0.855         | 0.001         | 0.005         | 0.001         | 0.002         |
| <b><i>V. microstachys</i></b> | <i>V. octoflora</i>    | <i>V. myuros</i>     | dry      | 152.9               | 1126.9      | 677.3       | 0.082         | 0.515         | 0.248         | 0.002         | 0.574         | 0.097         | 0.022         |

82 Notes: See table S1 and figure S1 for full species names and taxonomic information. Focal species *i* (bold) were competed against83 both species *j* (sympatric) and *k* (allopatric).

84 **Table S4**

85 **Germination (*g*) and species-specific seed bank viability (*s*) rates used for alternative seed**  
 86 **bank viability scenarios**

| <i>i</i>                      | Species                |                      | Germination          |                      |                      | Seed bank viability  |                      |                      |
|-------------------------------|------------------------|----------------------|----------------------|----------------------|----------------------|----------------------|----------------------|----------------------|
|                               | <i>j</i>               | <i>k</i>             | <i>g<sub>i</sub></i> | <i>g<sub>j</sub></i> | <i>g<sub>k</sub></i> | <i>s<sub>i</sub></i> | <i>s<sub>j</sub></i> | <i>s<sub>k</sub></i> |
| <b><i>B. carinatus</i></b>    | <i>H. depressum</i>    | <i>H. vulgare</i>    | 0.39                 | 0.24                 | 0.49                 | 0.17                 | 0.17                 | 0.00                 |
| <b><i>C. berlandieri</i></b>  | <i>C. perfoliata</i>   | <i>P. oleracea</i>   | 0.62                 | 0.25                 | 0.35                 | 0.00                 | 0.35                 | 0.11                 |
| <b><i>E. caespitosa</i></b>   | <i>E. californica</i>  | <i>P. dubium</i>     | 0.17                 | 0.08                 | 0.28                 | 0.18                 | 0.59                 | 0.28                 |
| <b><i>L. bicolor</i></b>      | <i>L. purshianus</i>   | <i>T. incarnatum</i> | 0.14                 | 0.17                 | 0.22                 | 0.01                 | 0.08                 | 0.07                 |
| <b><i>L. glabrata</i></b>     | <i>L. californica</i>  | <i>C. melitensis</i> | 0.58                 | 0.46                 | 0.48                 | 0.13                 | 0.23                 | 0.00                 |
| <b><i>M. nuttalliana</i></b>  | <i>A. patula</i>       | <i>S. gallica</i>    | 0.36                 | 0.24                 | 0.80                 | 0.59                 | NA                   | 0.00                 |
| <b><i>P. campanularia</i></b> | <i>N. menziesii</i>    | <i>M. arvensis</i>   | 0.54                 | 0.28                 | 0.61                 | 0.47                 | 0.64                 | 0.23                 |
| <b><i>S. columbariae</i></b>  | <i>C. heterophylla</i> | <i>S. viridis</i>    | 0.55                 | 0.40                 | 0.66                 | 0.29                 | 0.56                 | 0.00                 |
| <b><i>U. lindleyi</i></b>     | <i>M. elegans</i>      | <i>C. capillaris</i> | 0.32                 | 0.07                 | 0.09                 | 0.61                 | 0.03                 | 0.23                 |
| <b><i>V. microstachys</i></b> | <i>V. octoflora</i>    | <i>V. myuros</i>     | 0.54                 | 0.51                 | 0.63                 | 0.88                 | 0.71                 | 0.58                 |

87 Notes: See table S1 and figure S1 for full species names and taxonomic information. Focal

88 species *i* (bold) were competed against both species *j* (sympatric) and *k* (allopatric). Rates *g* and *s*

89 were calculated separately, from the germination of seeds in the low-density  $\lambda$  pots (for *g*) and

90 through a germination trial comparing germination rates before and after gibberellic acid

91 application (for *s*); the 0% and 100% seed bank viability scenarios were *s* = 0 and *s* = 1 for all

92 species, respectively (figure 2*b,e*). The same values of *g* and *s* were used in wet and dry

93 environments, because the watering treatments were imposed post-germination.



94 **Table S5**

95 **Effects of phylogenetic distance (PD), biogeographic history (BH), soil moisture (SM), and their interactions on stabilizing**  
 96 **differences, fitness differences, and coexistence**

|                  | logit(stabilizing differences) |                 | log(fitness differences) |                  | log(coexistence metric) |                 |
|------------------|--------------------------------|-----------------|--------------------------|------------------|-------------------------|-----------------|
|                  | $\chi^2$                       | <i>P</i> -value | $\chi^2$                 | <i>P</i> -value  | $\chi^2$                | <i>P</i> -value |
| PD               | 0.02                           | 0.900           | 17.72                    | <b>&lt;0.001</b> | 2.08                    | 0.149           |
| BH               | 0.70                           | 0.403           | 5.82                     | <b>0.016</b>     | 1.92                    | 0.166           |
| SM               | 0.01                           | 0.922           | 0.26                     | 0.613            | 1.94                    | 0.164           |
| PD × BH          | 8.75                           | <b>0.003</b>    | 2.60                     | 0.107            | 3.89                    | <b>0.049</b>    |
| PD × SM          | 1.15                           | 0.283           | 1.21                     | 0.271            | 2.07                    | 0.151           |
| BH × SM          | 1.12                           | 0.290           | 0.38                     | 0.537            | 0.18                    | 0.675           |
| PD × BH × SM     | 0.08                           | 0.775           | <0.01                    | 0.960            | <0.01                   | 0.979           |
| Variance weights | none                           |                 | varIdent(form=~PD BH)    |                  | varPower(form=~PD)      |                 |

97 Notes: All *P*-values based on a  $\chi^2$  tests of maximum likelihood ratios with 1 degree of freedom, summarized using the ‘Anova’  
 98 function in ‘car’ R package; significant *P*-values are in bold type.

99

100 **Table S6**

101 **Effects of phylogenetic distance (PD) on the fitness components of sympatric and allopatric species pairs**

|                       | Sympatric |                  | Allopatric |                 |
|-----------------------|-----------|------------------|------------|-----------------|
|                       | $\chi^2$  | <i>P</i> -value  | $\chi^2$   | <i>P</i> -value |
| Demographic component | 5.91      | <b>0.015</b>     | 0.70       | 0.402           |
| Competitive component | 0.02      | 0.881            | 6.67       | <b>0.010</b>    |
| Fitness difference    | 11.39     | <b>&lt;0.001</b> | 7.35       | <b>0.007</b>    |

102 Notes: All *P*-values based on a  $\chi^2$  tests of maximum likelihood ratios with 1 degree of freedom, summarized using the ‘Anova’

103 function in ‘car’ R package; significant *P*-values are in bold type. Variance weights are varIdent(~PD) for allopatric pairs; no weights

104 were necessary for sympatric pairs.

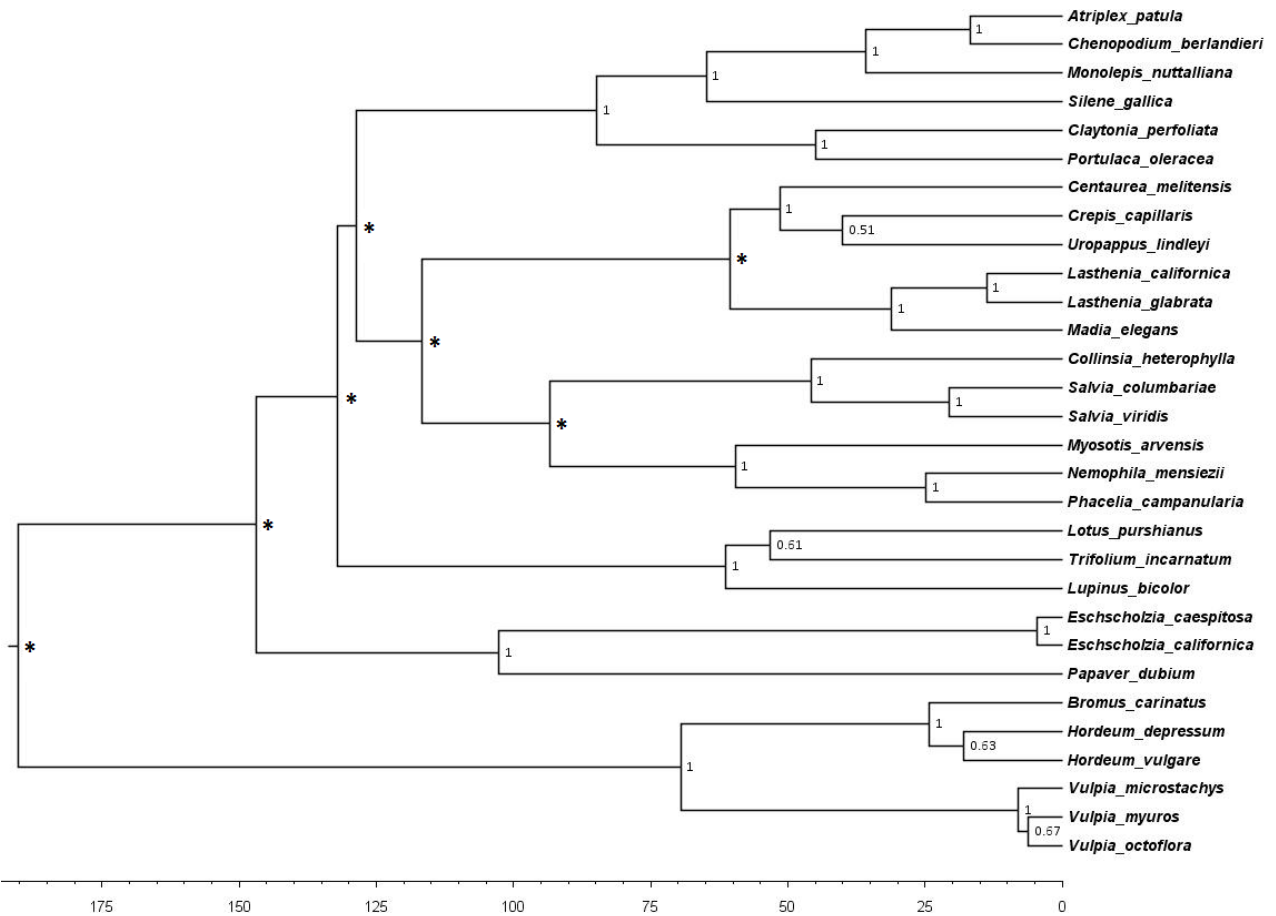

105

106 **Figure S1.**

107 Maximum clade credibility tree of the 30 annual plant species with median node heights. The  
 108 tree was generated in BEAST using ITS1/5.8S/ITS2 and rbcL sequence data, and calibrated to  
 109 real-time based on fossil records. The scale bar is in millions of years ago, and nodal support  
 110 values are the posterior probabilities; \* indicates nodes that were fixed based on *a priori*  
 111 information. See table S1 for species information.
